# Supplementary material for: Sensitivity of Multiphase Pseudocontinuous Arterial Spin Labelling (MP pCASL) Magnetic Resonance Imaging for Measuring Brain and Tumour Blood Flow in Mice
Source: Contrast Media Mol Imaging. 2018 Nov 7;2018:4580919. doi: 10.1155/2018/4580919 (PMC6247770; doi:10.1155/2018/4580919)
Supplement: Supplementary Materials — Supplementary Figure 1 (video): example MP pCASL images with (A) and without (B) respiratory triggering. Respiratory triggering reduces signal fluctuation at the base of the brain. Supplementary Figure 2: signal-to-noise ratio (SNR) of the MP pCASL sequence with and without respiratory triggering (n=4, ∗ p < 0.05). Supplementary Figure 3: microvessel density of brain regions in naïve animals used for autoradiography (n=4). ∗ p < 0.05; ∗∗ p < 0.01 Supplementary Figure 4: plot showing correlations between CBF and microvessel density in a subset of animals (n=6) with a gadolinium enhancing rim and nonenhancing core structure. Linear regression lines for each dataset are plotted, showing a trend towards an inverse correlation between CBF and microvessel density for core and rim regions. Supplementary Figure 5: change in theoretical signal saturation over a range of label durations. [file 4580919.f1.zip]

Archive with 6 entries (6 files):
- 4580919.f1/Supplementary Information Figure 1_CMMI_2502592.mp4
- 4580919.f1/Supplementary Information Figure 2_CMMI_2502593.eps
- 4580919.f1/Supplementary Information Figure 3_CMMI_2502594.eps
- 4580919.f1/Supplementary Information Figure 4_CMMI_2502595.eps
- 4580919.f1/Supplementary Information Figure 5_CMMI_2502596.eps
- 4580919.f1/Supplementary Material FINAL_CMMI_2502591.docx
